# Supplementary material for: ProFAT: a web-based tool for the functional annotation of protein sequences
Source: Springer Nature journal article supplement (doi:10.1186/1471-2105-7-466), 2006-10-23
Supplement: Additional file 1 [file 1471-2105-7-466-s1.pdf]

## **Additional File 1: Keyword lists used**

### ***Cell Cycle***

cell cycle  
APC  
cyclin  
cyclin-dependent kinase  
anaphase promoting complex  
activator  
cdc20  
cdh1  
fizzy  
separase  
cohesin  
sister chromatid cohesion  
securin  
cell division  
proliferation  
prophase  
metaphase  
anaphase  
telophase  
S-phase  
M-phase  
interphase  
replication  
S-phase promoting complex  
meiosis  
mitosis  
spindle pole  
centrosome  
centromere  
spindle  
metaphase plate  
ubiquitin ligase  
cell-cycle dependent proteolysis  
bipolar attachment  
monopolar attachment  
cytokinesis

### ***Endocytosis***

endocytosis  
intracellular transport  
intracellular signaling  
membrane binding  
Pi3P  
Rab5  
Rab  
GTPase  
Vesicle trafficking  
protein sorting  
vesicle budding  
membrane fusion  
tubulation  
vesicle fission  
TGN  
Golgi  
vesicle motility  
cytoskeleton  
early endosome

|                                                            |                                                                                                                                                                                                                                                                                                                                                                                                                                                                                  |
|------------------------------------------------------------|----------------------------------------------------------------------------------------------------------------------------------------------------------------------------------------------------------------------------------------------------------------------------------------------------------------------------------------------------------------------------------------------------------------------------------------------------------------------------------|
|                                                            | <ul style="list-style-type: none"> <li>recycling endosome</li> <li>Rab4</li> <li>Rab11</li> <li>transcytosis</li> <li>compartement</li> </ul>                                                                                                                                                                                                                                                                                                                                    |
| <b><i>Epigenetics</i></b>                                  | <ul style="list-style-type: none"> <li>epigenetics</li> <li>chromatin</li> <li>histone methylation</li> <li>jumonji domain</li> <li>SET domain</li> <li>LSD1</li> </ul>                                                                                                                                                                                                                                                                                                          |
| <b><i>Transcription</i></b>                                | <ul style="list-style-type: none"> <li>transcriptional control</li> <li>transcriptional regulation</li> <li>RNA polymerase</li> <li>RNAP</li> <li>elongation</li> <li>transcription factor</li> <li>transcriptional termination</li> <li>polII</li> <li>polI</li> <li>polIII</li> <li>enhancer</li> <li>promoter</li> <li>enhancer element</li> <li>DNA-binding</li> <li>TATA box-binding</li> <li>transcriptional repressor</li> <li>transcription initiation factor</li> </ul> |
| <b><i>APPL1</i></b>                                        | <ul style="list-style-type: none"> <li>endocytosis</li> <li>intracellular transport</li> <li>vesicle trafficking</li> <li>vesicle movement</li> <li>vesicle fission</li> <li>vesicle fusion</li> <li>vesicle motility</li> <li>tubulation</li> <li>GTPase binding</li> <li>small GTPase</li> <li>Rab</li> <li>cytoskeleton</li> <li>actin binding</li> <li>tubulin binding</li> <li>microtubules</li> <li>actin</li> <li>tubulin</li> <li>signaling</li> </ul>                   |
| <b><i>Microtubule/Cytoskeleton-associated proteins</i></b> | <ul style="list-style-type: none"> <li>endocytosis</li> <li>vesicle trafficking</li> <li>vesicle movement</li> <li>cytoskeleton</li> <li>actin binding</li> <li>tubulin binding</li> <li>actin</li> <li>tubulin</li> <li>microtubules</li> <li>motor protein</li> </ul>                                                                                                                                                                                                          |

|                                 |                                                                                                                                                                                                                                                                                                                                                                                                                    |
|---------------------------------|--------------------------------------------------------------------------------------------------------------------------------------------------------------------------------------------------------------------------------------------------------------------------------------------------------------------------------------------------------------------------------------------------------------------|
| <i>RNA binding proteins</i>     | <ul style="list-style-type: none"> <li>RNA binding</li> <li>nucleic acid binding</li> <li>translation</li> <li>translational regulation</li> <li>3'UTR</li> <li>RNA binding domain</li> <li>RBD</li> <li>RRM</li> <li>poly-adenylation</li> <li>adenylation</li> <li>RNase</li> <li>RNA degradation</li> <li>RNA stability</li> </ul>                                                                              |
| <i>EPS8 like proteins</i>       | <ul style="list-style-type: none"> <li>translation</li> <li>transcription</li> <li>nucleic acid binding</li> <li>RNA binding</li> <li>UTR</li> <li>protein interaction</li> <li>homodimerization</li> <li>heterodimerization</li> <li>signaling</li> </ul>                                                                                                                                                         |
| <i>PABP domain family</i>       | <ul style="list-style-type: none"> <li>polyadenylate-binding</li> <li>poly-A tail</li> <li>cap structure</li> <li>translation</li> <li>translational regulation</li> <li>activation of translation</li> <li>repression of translation</li> <li>translational activation</li> <li>translational repression</li> <li>RNA binding domain</li> <li>RBD</li> <li>PABP</li> <li>polyadenylate-binding protein</li> </ul> |
| <i>PLAT domain family</i>       | <ul style="list-style-type: none"> <li>lipid binding</li> <li>lipid association</li> <li>lipid metabolism</li> <li>membrane binding</li> <li>membrane association</li> <li>membrane attachment</li> <li>membrane dynamics</li> <li>polycystin-1</li> <li>lipxygenase</li> <li>lipxygenase homology</li> <li>colipase</li> <li>lipogenase</li> <li>lipase</li> </ul>                                                |
| <i>HNF-1<math>\alpha</math></i> | <ul style="list-style-type: none"> <li>transcription factor</li> <li>hepatocyte nuclear factor</li> <li>homeo-box</li> <li>DNA-binding</li> <li>regulation of transcription</li> <li>transcriptional regulation</li> <li>transcriptional activation</li> <li>activation of transcription</li> </ul>                                                                                                                |

transcriptional transactivation  
transcription  
enhancer  
enhancer of transcription  
promoter sequence  
enhancer sequence
