# Supplementary material for: ProFAT: a web-based tool for the functional annotation of protein sequences
Source: Springer Nature journal article supplement (doi:10.1186/1471-2105-7-466), 2006-10-23
Supplement: Additional file 10 [file 1471-2105-7-466-s10.pdf]

## Additional file 10: Accession Numbers

Figure 7 A: CH-domain alignment

|                   |                     |
|-------------------|---------------------|
| <b>ScFimbrin</b>  | [GenBank:P32599]    |
| <b>RnPlastin3</b> | [GenBank:Q63598]    |
| <b>HsFilaminA</b> | [GenBank:P21333]    |
| <b>HsIQGAP1</b>   | [GenBank:P46940]    |
| <b>DdFimbrin</b>  | [GenBank:P54680]    |
| <b>DmCG8953</b>   | [GenBank:AAF55366]  |
| <b>CeC10G11.7</b> | [GenBank:AAB42247]  |
| <b>Hook1</b>      | [GenBank:NP_056972] |
| <b>Hook2</b>      | [GenBank:NP_037444] |
| <b>Hook3</b>      | [GenBank:NP_115786] |
| <b>HsKPL2</b>     | [GenBank:NP_653323] |
| <b>SpuKPL2</b>    | [GenBank:XP_781844] |
| <b>CrCPC1</b>     | [GenBank:AAT40991]  |

Figure 7 B: SAM-domain alignment

|                    |                     |
|--------------------|---------------------|
| <b>RnEPA3</b>      | [GenBank:O08680]    |
| <b>CeF13B10.1a</b> | [GenBank:CAA90182]  |
| <b>HsDLC-1</b>     | [GenBank:AAB87700]  |
| <b>CeF53F8.5</b>   | [GenBank:CAB04458]  |
| <b>HsLiprina2</b>  | [GenBank:AAC26100]  |
| <b>MmTA *p63a</b>  | [GenBank:AAC62641]  |
| <b>SpMKH1</b>      | [GenBank:Q10407]    |
| <b>HsSLP76</b>     | [GenBank:Q13094]    |
| <b>CeC11E4.6</b>   | [GenBank:CAB02658]  |
| <b>HsEPS8L3</b>    | [GenBank:NP_620641] |
| <b>MmEPS8L3</b>    | [GenBank:AAH14734]  |
| <b>TnEPS8L3</b>    | [GenBank:CAG06824]  |
| <b>HsEPS8L2</b>    | [GenBank:AAI01482]  |
| <b>MmEPS8L2</b>    | [GenBank:NP_573454] |
| <b>HsEPS8</b>      | [GenBank:NP_004438] |
| <b>MmEPS8</b>      | [GenBank:NP_031971] |
| <b>GgEPS8</b>      | [GenBank:XP_416405] |
| <b>DrEPS8</b>      | [GenBank:AAH47814]  |
| <b>DmEPS8</b>      | [GenBank:NP_650585] |
| <b>CeEPS8</b>      | [GenBank:NP_502802] |

Figure 7 C: RRM-domain alignment

|                    |                      |
|--------------------|----------------------|
| <b>HsTia1</b>      | [GenBank:P31483]     |
| <b>AtRT19</b>      | [GenBank:P39697]     |
| <b>NsRoc5</b>      | [GenBank:P19684]     |
| <b>DmSrp55</b>     | [GenBank:P26686]     |
| <b>DmElav</b>      | [GenBank:P16914]     |
| <b>HsParn</b>      | [GenBank:NP_002573]  |
| <b>AmParn</b>      | [GenBank:XP_392167]  |
| <b>AtParn</b>      | [GenBank:Q9LG26]     |
| <b>HsLOC84060</b>  | [GenBank:NP_115496]  |
| <b>DrLOC402897</b> | [GenBank:NP_991167]  |
| <b>DmHDC05885</b>  | [GenBank:DAA02438.1] |

Figure 7 D: Acetyl-transferase alignment

|                    |                     |
|--------------------|---------------------|
| <b>MtCAB08501</b>  | [GenBank:CAB08501]  |
| <b>TaCAA12252</b>  | [GenBank:CAA12252]  |
| <b>AbIAAT</b>      | [GenBank:P26945]    |
| <b>MtRimI</b>      | [GenBank:NP_217937] |
| <b>MjMJ1207</b>    | [GenBank:Q58604]    |
| <b>EcAAA62661</b>  | [GenBank:AAA62661]  |
| <b>MthAAB85181</b> | [GenBank:AAB85181]  |
| <b>HsFus2</b>      | [GenBank:Q93015]    |
| <b>HsLOC79969</b>  | [GenBank:NP_079185] |
| <b>DmCG3967</b>    | [GenBank:NP_648309] |
| <b>CeMec-17</b>    | [GenBank:NP_501337] |
